# Supplementary material for: Sequential determination of iron species in food samples by new task specific ionic liquid based in situ dispersive liquid–liquid microextraction prior to flame atomic absorption spectrometry
Source: Royal Society of Chemistry journal article supplement (doi:10.1039/c6ay00839a), 2016-01-01
Supplement: c6ay00839a1.pdf [file c6ay00839a1.pdf]

Fig. S1

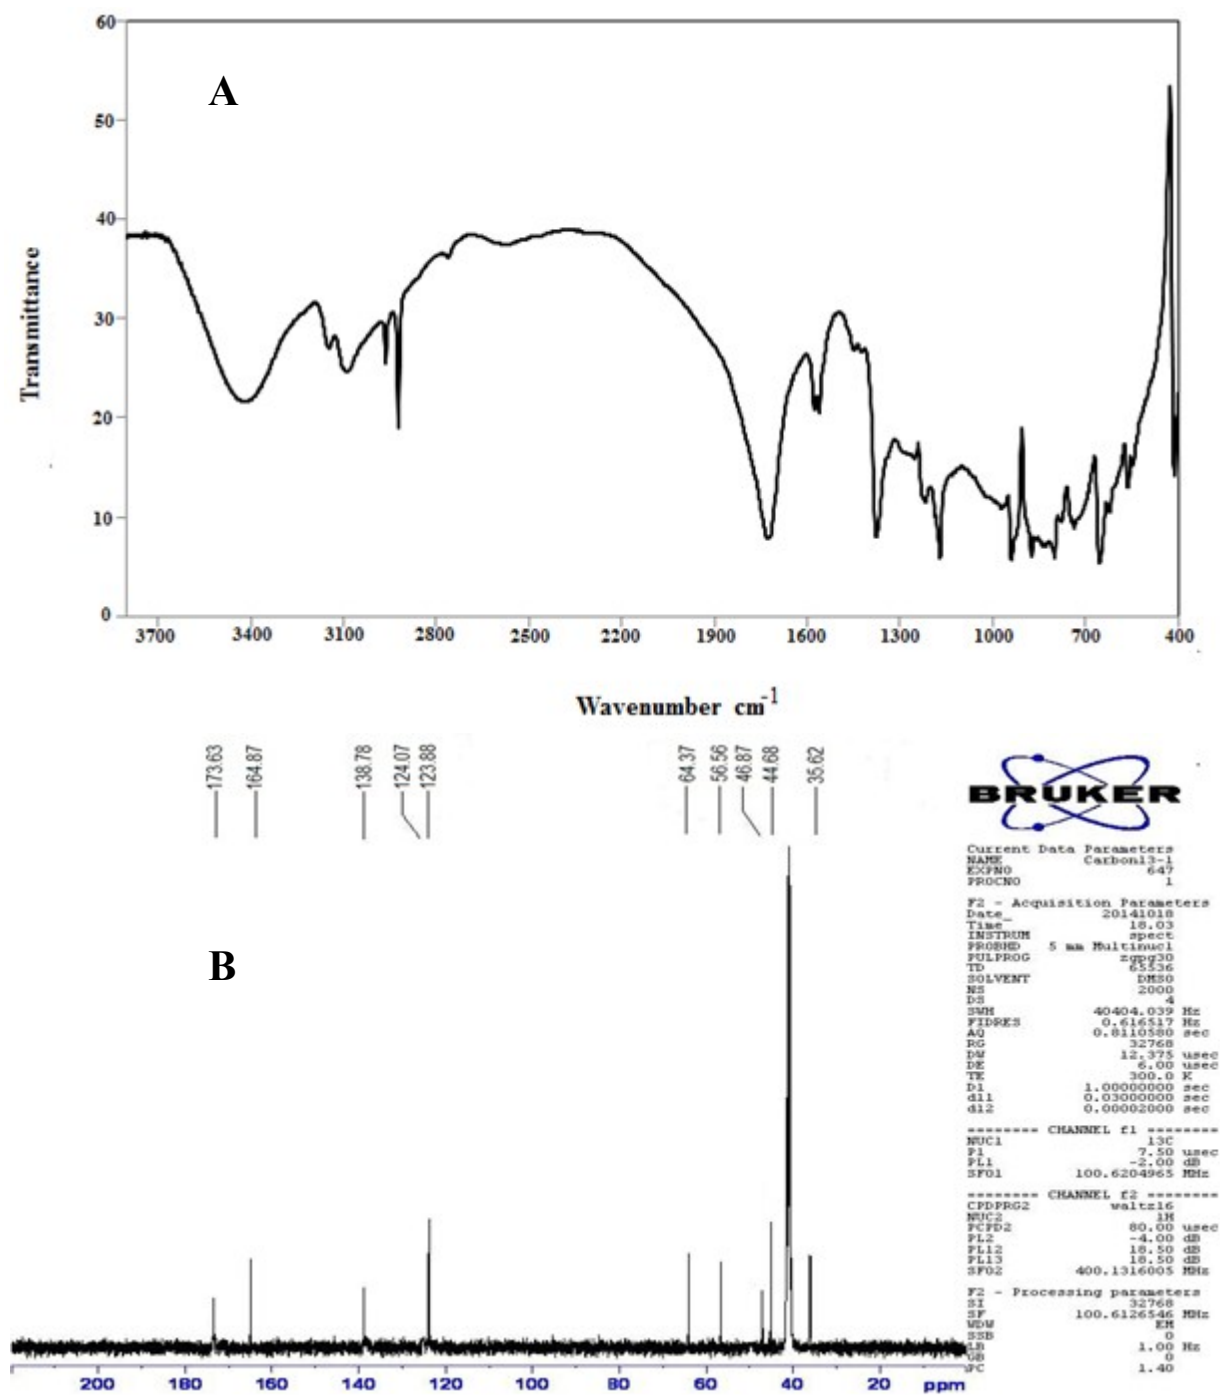

(A) FTIR and (B) <sup>13</sup>CNMR spectra of [TH-C<sub>1</sub>C<sub>2</sub>Im][Br]

Fig. S2

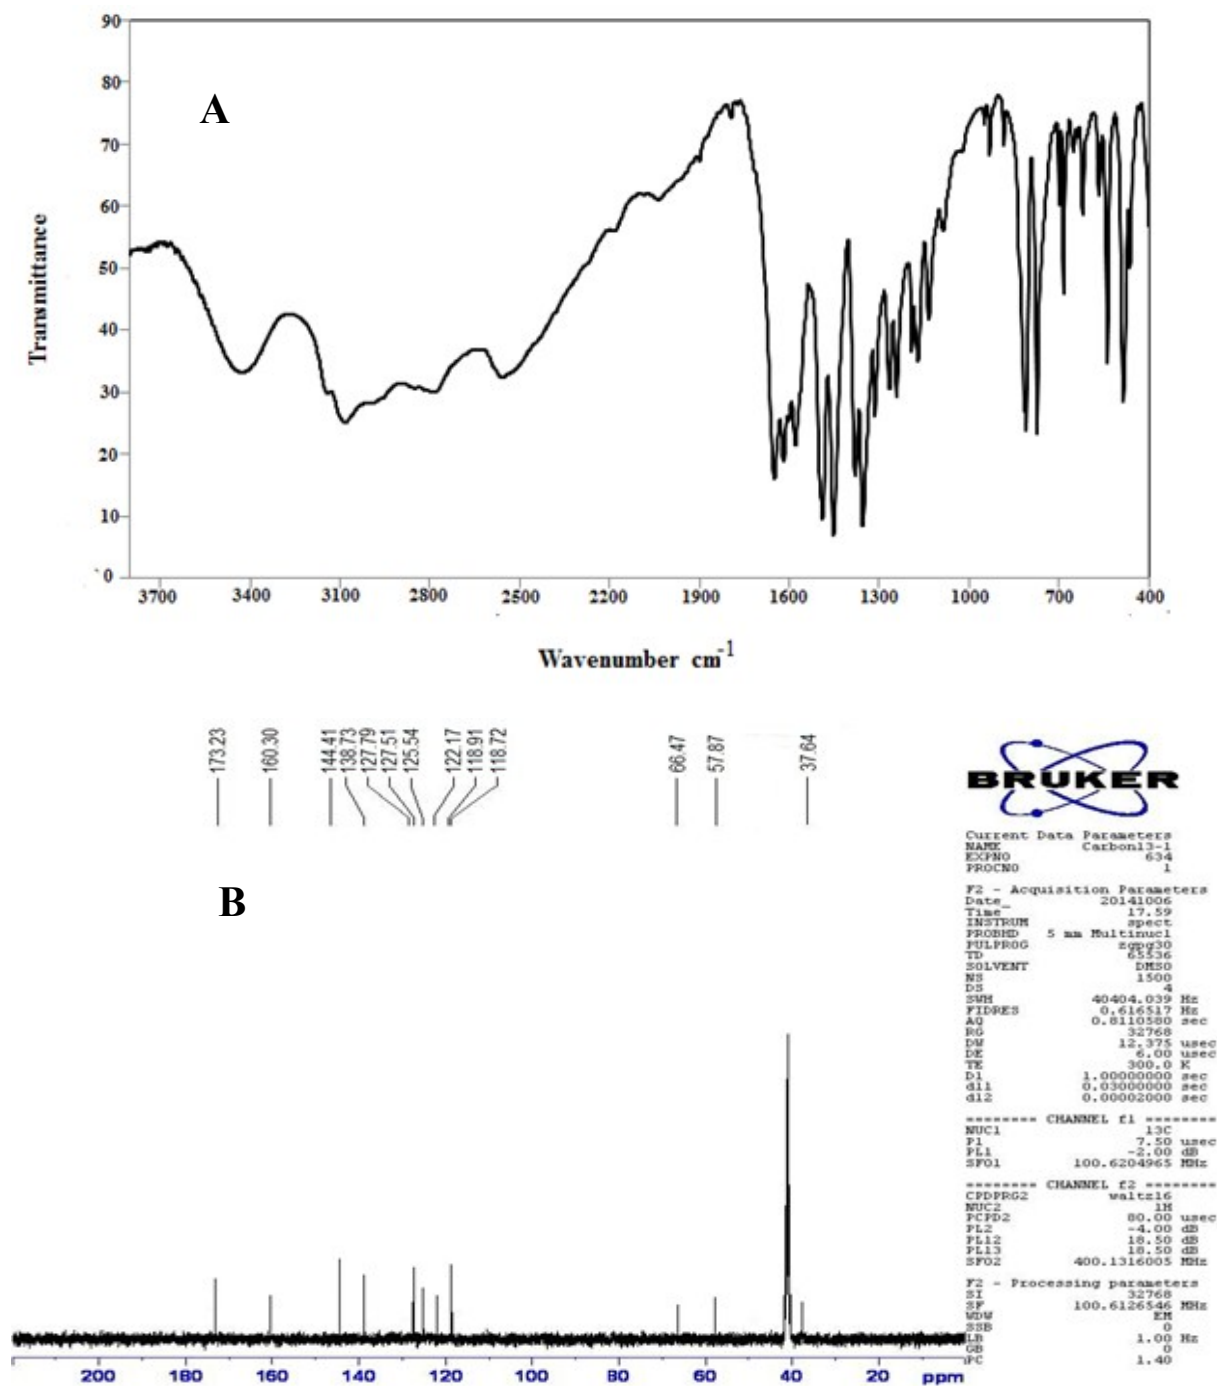

(A) FTIR and (B)  $^{13}\text{C}$ NMR spectra of [5-ASA- $\text{C}_1\text{C}_2\text{Im}$ ][Br]
